# Supplementary material
Source: PubMed Central journal article supplement (PMC3920175)
Supplement: NIHMS32259-supplement-2.pdf [file NIHMS32259-supplement-2.pdf]

## Supporting Information

© Copyright Wiley-VCH Verlag GmbH & Co. KGaA, 69451 Weinheim, 2010

### **Proteins as Possible Targets for Cytotoxic *trans*-Platinum(II) Complexes with Aliphatic Amine Ligands: Further Exceptions to the DNA Paradigm**

Leticia Cubo,<sup>[a]</sup> Michael Groessel,<sup>[b]</sup> Paul J. Dyson,<sup>[b]</sup> Adoración G. Quiroga,<sup>\*[a]</sup>  
Carmen Navarro-Ranninger,<sup>[a]</sup> and Angela Casini<sup>\*[b]</sup>

cmdc\_201000104\_sm\_miscellaneous\_information.pdf

## Supporting Information

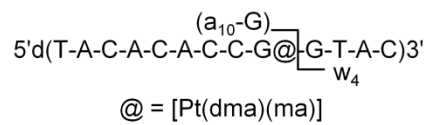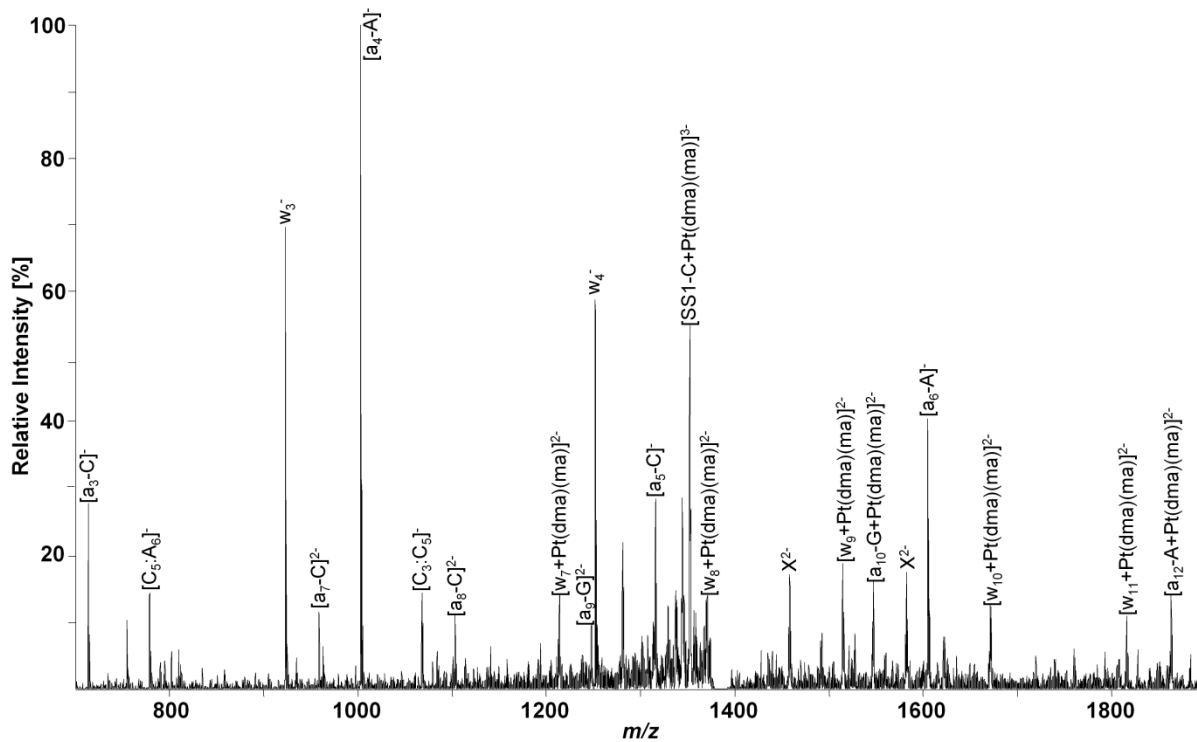

**Figure S1.** An expanded segment of a CID mass spectrum of SS1 modified by **2** in the range 700 to 1900  $m/z$  containing the majority of platinated fragments. Unidentified fragments exhibiting an isotopic distribution characteristic for platinum are labeled X.

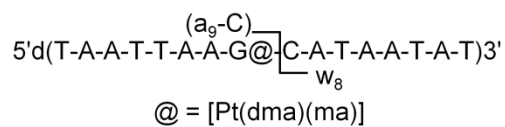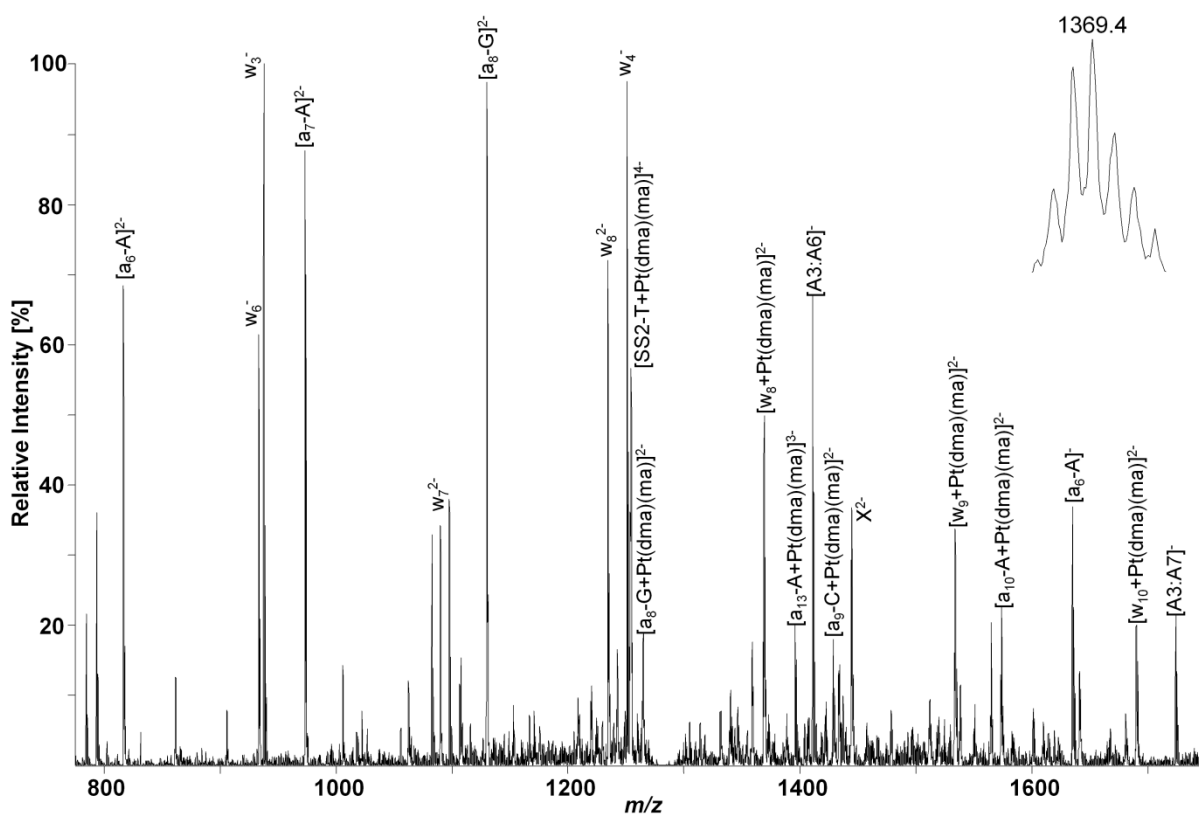

**Figure S2.** An expanded segment of a CID mass spectrum of SS2 modified by **2** in the range 750 to 1750  $m/z$  containing the majority of platinated fragments (parent ion:  $[\text{SS2}+\text{Pt}(\text{dma})(\text{ma})]^{4-}$  at 1287.8  $m/z$ ). Unidentified fragments exhibiting an isotopic distribution characteristic for platinum are labeled X. The insert shows a close-up of the platinated peak at 1369.4  $m/z$  corresponding to  $[\text{w}_8+\text{Pt}(\text{dma})(\text{ma})]^{2-}$ .
